# Supplementary material for: Boron Nitride Nanosheets/PNIPAM Hydrogels with Improved Thermo-Responsive Performance
Source: PubMed Central journal article supplement (PMC6073573; doi:10.3390/ma11071069), 2018-06-24
Supplement: materials-11-01069-s001.pdf [file materials-11-01069-s001.pdf]

Supplementary

# Boron Nitride Nanosheets/PNIPAM Hydrogels with Improved Thermo-Responsive Performance

Shishan Xue <sup>1</sup>, Yuanpeng Wu <sup>1,2\*</sup>, Jiemin Wang <sup>3</sup>, Meiling Guo <sup>1</sup>, Dan Liu <sup>3\*</sup> and Weiwei Lei <sup>3\*</sup>

<sup>1</sup> School of Material Science and Engineering, Southwest Petroleum University, Chengdu 610500, China; 201711000008@stu.swpu.edu.cn (S.X.); 201621000011@stu.swpu.edu.cn (M.G.)

<sup>2</sup> State Key Laboratory of Oil and Gas Reservoir Geology and Exploitation, Southwest Petroleum University, Chengdu 610500, China

<sup>3</sup> Institute for Frontier Materials, Deakin University, Locked Bag 2000, Geelong, VIC 3220, Australia; jiemin@deakin.edu.au

\* Correspondence: ypwu@swpu.edu.com (Y.W.); dan.liu@deakin.edu.au (D.L.); weiwei.lei@deakin.edu.au (W.L.); Tel.: +86-028-8303-7404 (Y.W.)

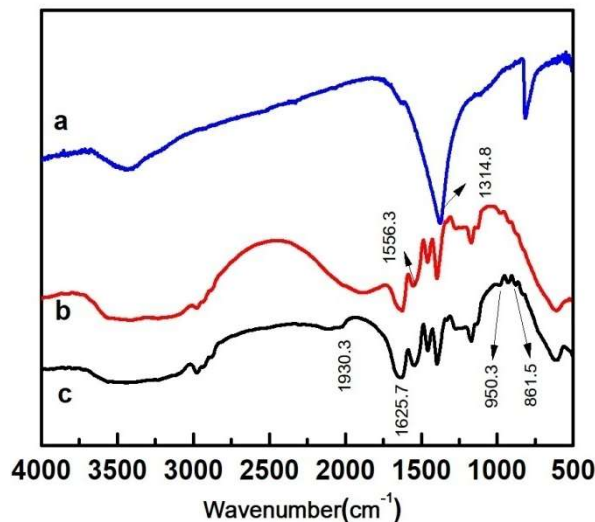

**Figure S1.** FT-IR spectra of (a) BNNS-NH<sub>2</sub>, (b) pure PNIPAM hydrogels and (c) PNIPAM/BNNS-NH<sub>2</sub> hydrogels.

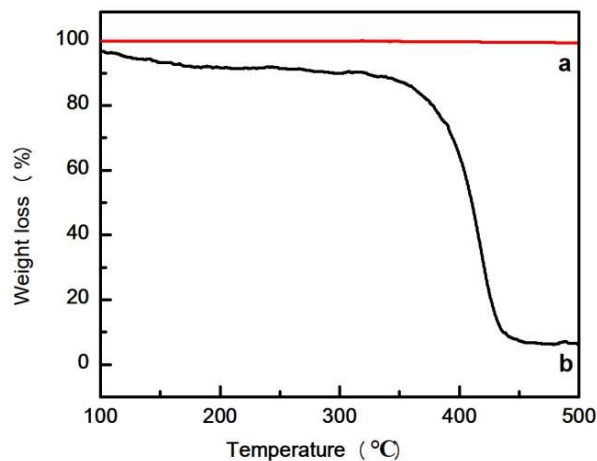

**Figure S2.** TGA curves of BNNS-NH<sub>2</sub> (a) and PNIPAM/BNNS-NH<sub>2</sub> hydrogels with the concentration of BNNS-NH<sub>2</sub> is 0.06 mg/mL (b).

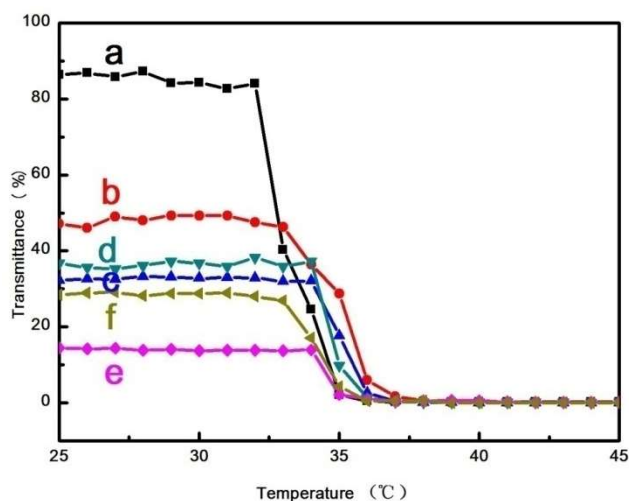

**Figure S3.** LCST of the hydrogels (a) pristine PNIPAM, (b) PNIPAM with BNNS-NH<sub>2</sub> concentration of 0.02 mg/mL, (c) PNIPAM with BNNS-NH<sub>2</sub> concentration of 0.04 mg/mL, (d) the PNIPAM with BNNS-NH<sub>2</sub> concentration of 0.06 mg/mL, (e) the PNIPAM with BNNS-NH<sub>2</sub> concentration of 0.10 mg/mL, (f) the PNIPAM with BNNS-NH<sub>2</sub> concentration of 0.20 mg/mL. (The transmittance is tested at 700 nm of UV-vis.).

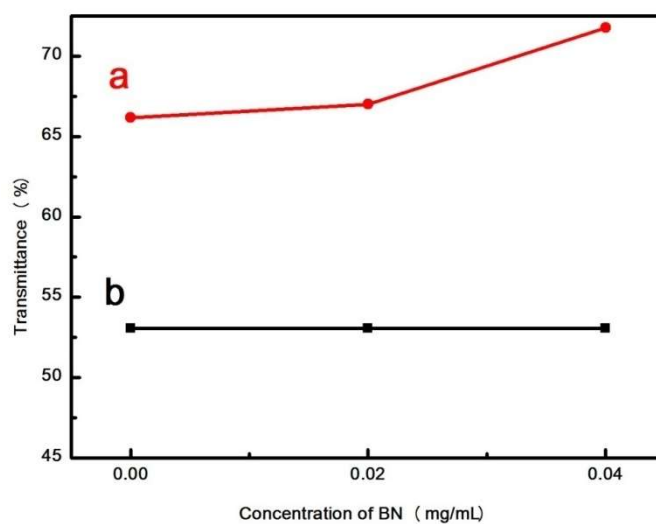

**Figure S4.** Transmittance of dye solution after dye penetrant test (a) the dye solution which were put inside the hydrogels with different concentration BNNS-NH<sub>2</sub> for 2 days, (b) the original dye solution. (The transmittance is tested at 610 nm of UV-vis).

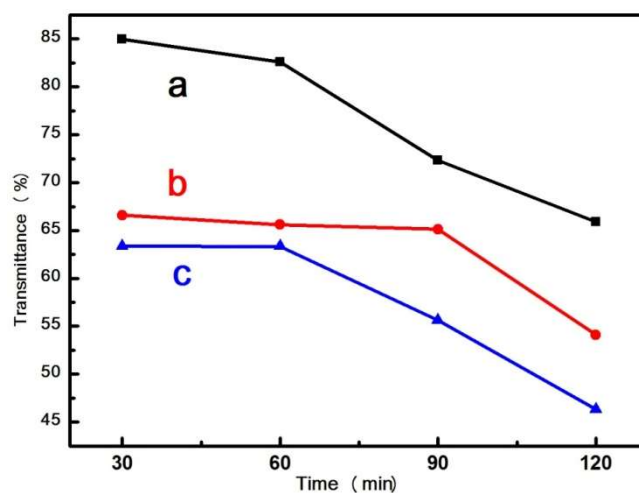

**Figure S5.** Transmittance of the dye solution after dye release test (a) the hydrogel without BNNS-NH<sub>2</sub> in hot water, (b) the hydrogel with the BNNS-NH<sub>2</sub> concentration of 0.02 mg/mL, (c) the hydrogel with the BNNS-NH<sub>2</sub> concentration of 0.04 mg/mL (The transmittance is tested at 610 nm of UV-vis.).

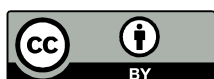

© 2018 by the authors. Submitted for possible open access publication under the terms and conditions of the Creative Commons Attribution (CC BY) license (<http://creativecommons.org/licenses/by/4.0/>).
